# Supplementary material for: ACP-ADA: A Boosting Method with Data Augmentation for Improved Prediction of Anticancer Peptides
Source: MDPI journal article supplement (doi:10.3390/ijms232012194), 2022-10-13
Supplement: s1 [file s1]

A dark blue outline of a house, consisting of a triangular roof and a rectangular base. The letters 'MDPI' are centered within the rectangular base of the house.

**MDPI**
