# Supplementary figures and images for: ACP-ADA: A Boosting Method with Data Augmentation for Improved Prediction of Anticancer Peptides
Source: MDPI journal article supplement (doi:10.3390/ijms232012194), 2022-10-13

Performance of Model on Independent Test Dataset-ACP214

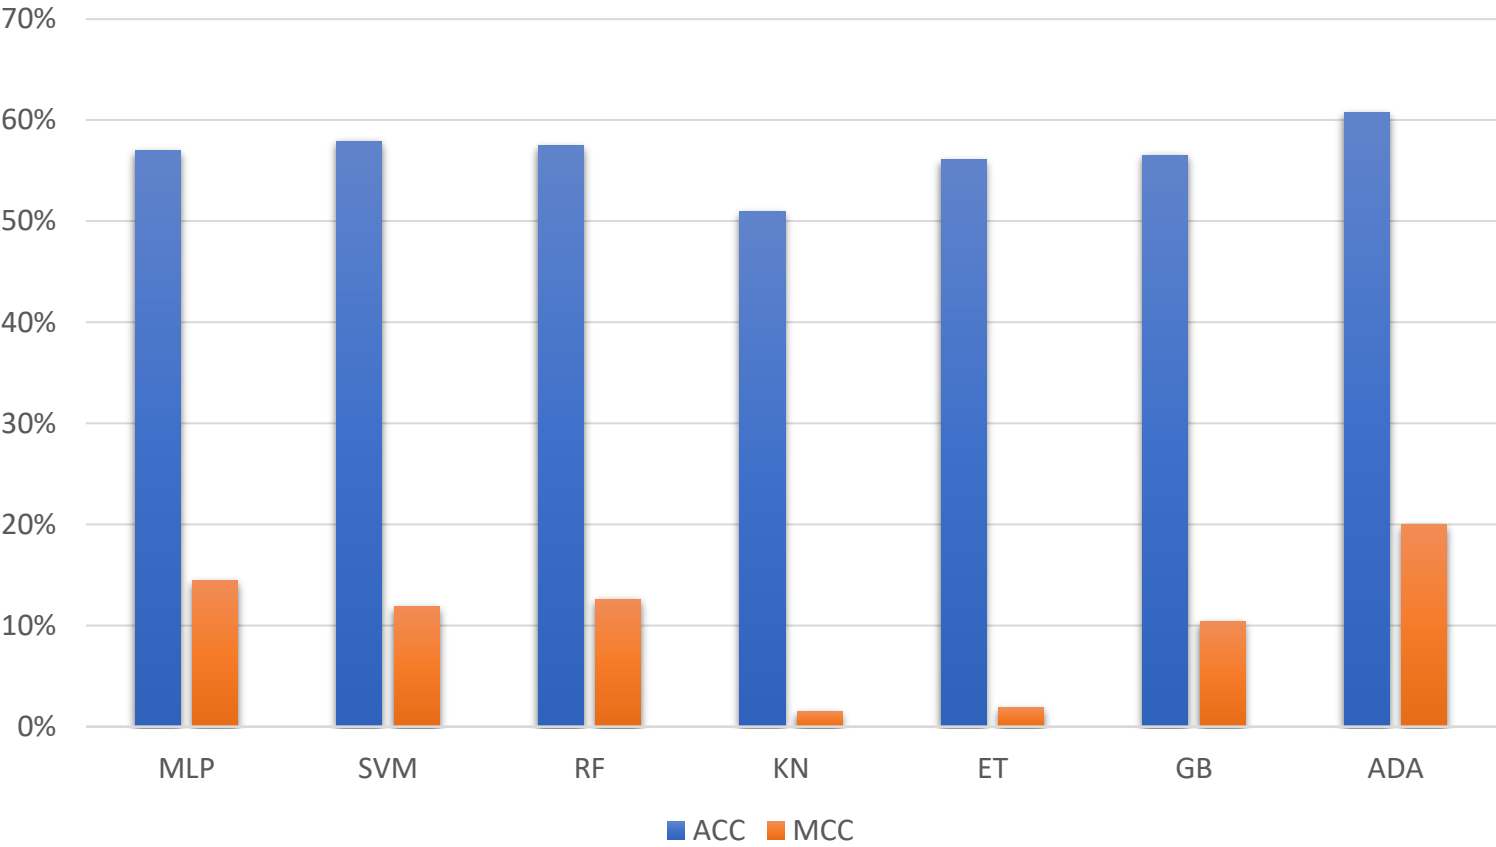

Supplement: s1 [file s1]

ACP740  
Feature Importance

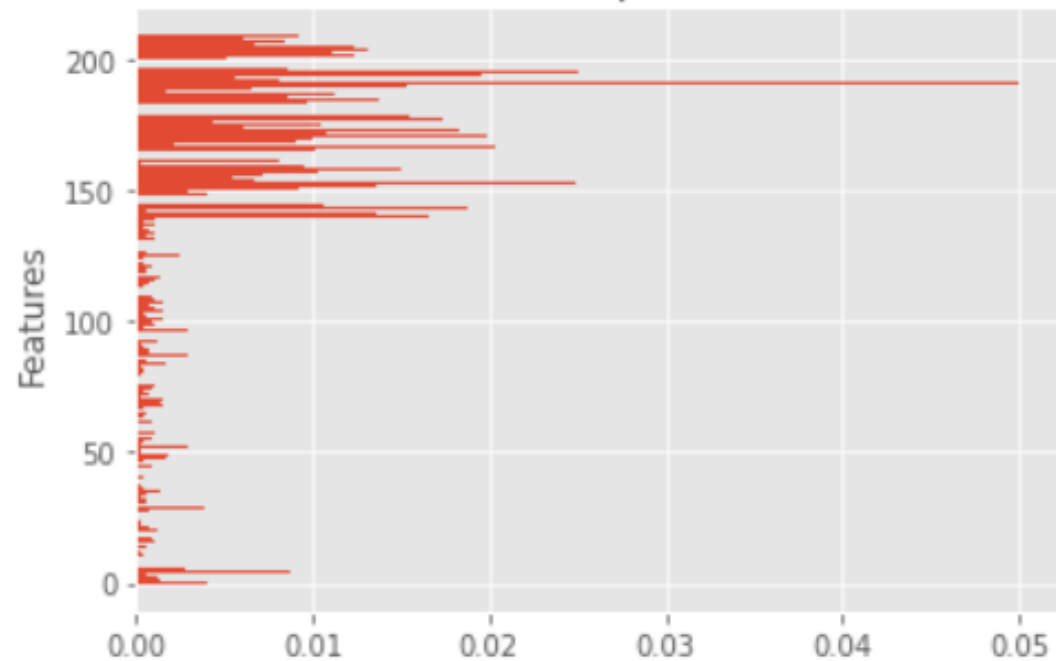

ACP240  
Feature Importance

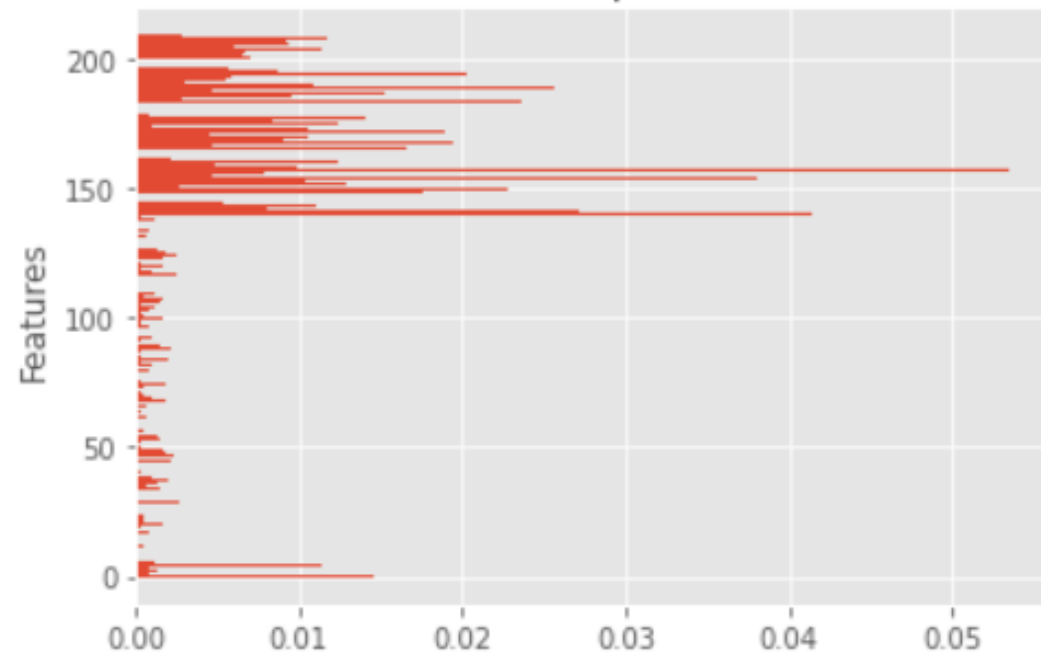

Supplement: s1 [file s1]

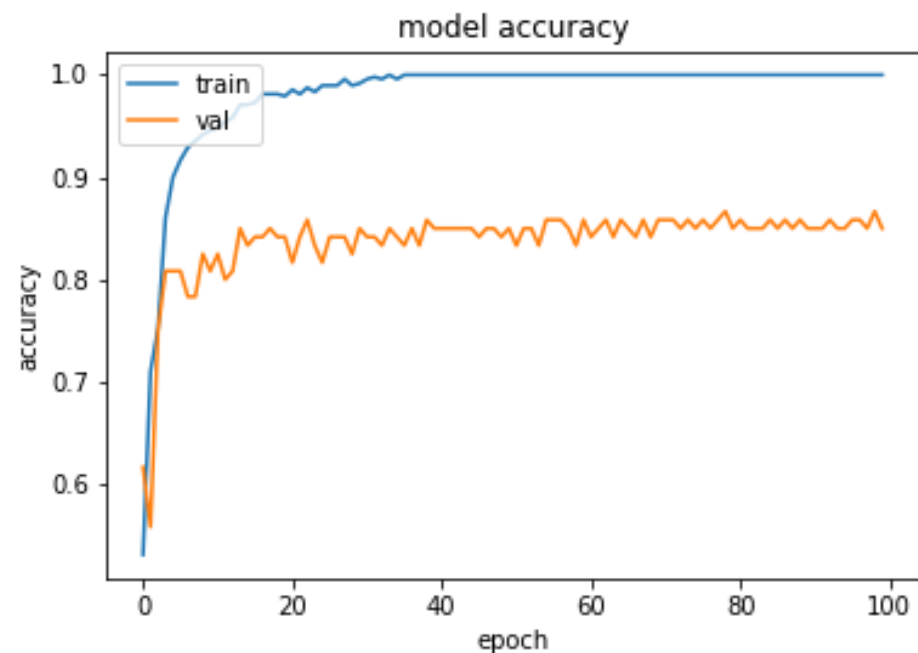

Overfitting problem in DNN

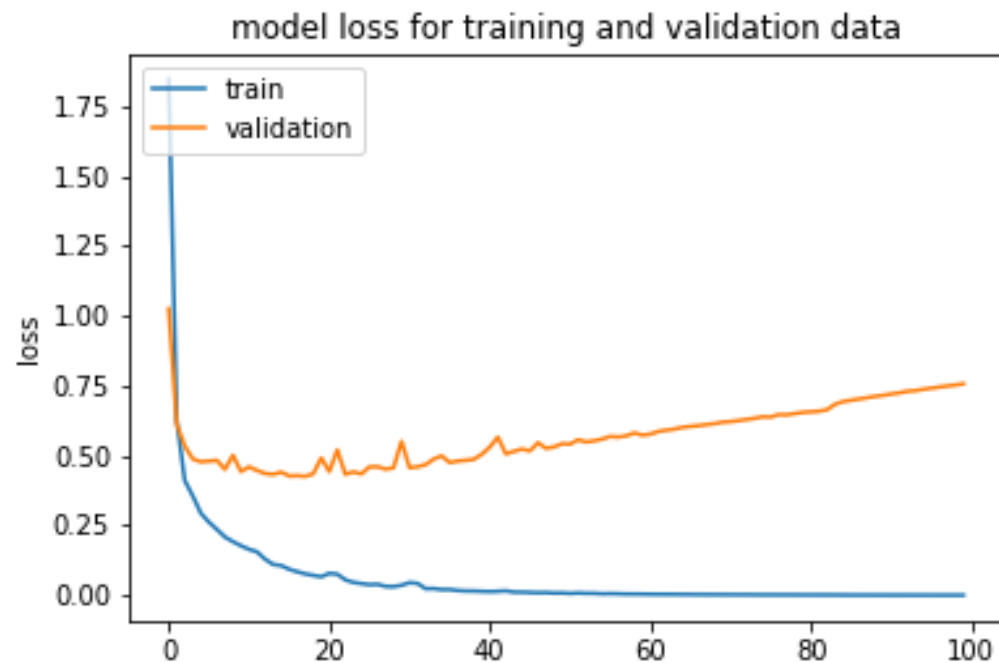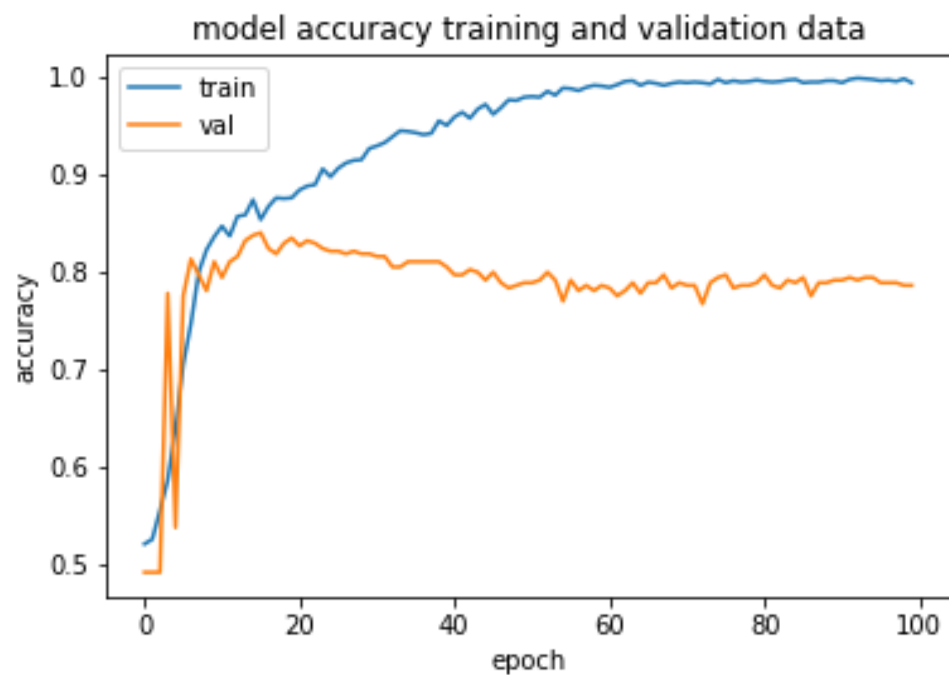

Overfitting problem in CNN

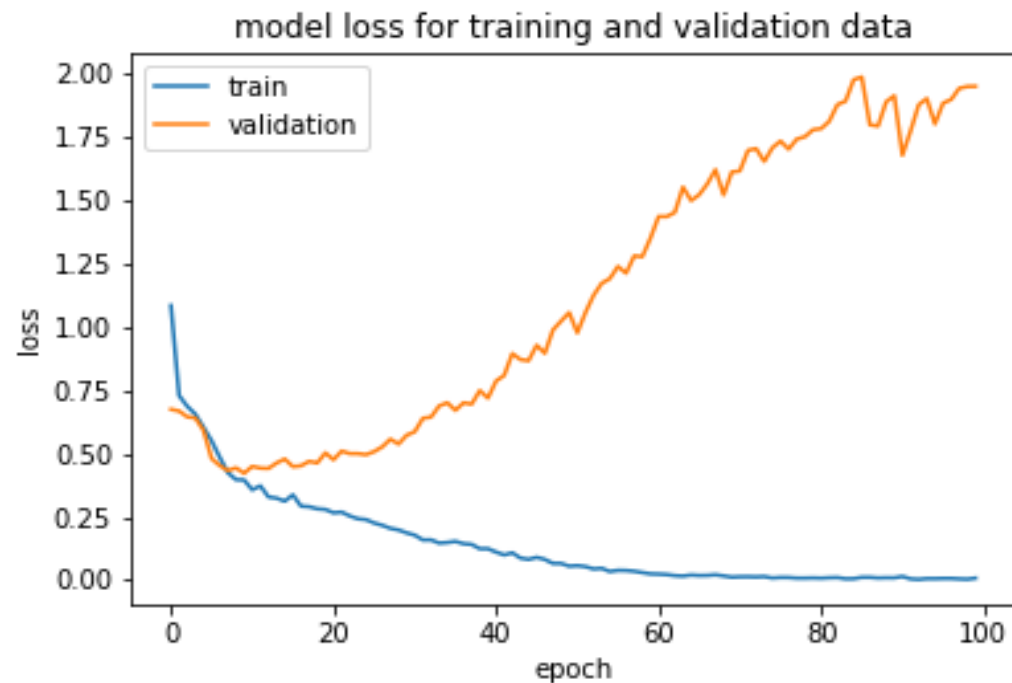

Supplement: s1 [file s1]

Performance Comparison without PSSM and with PSSM

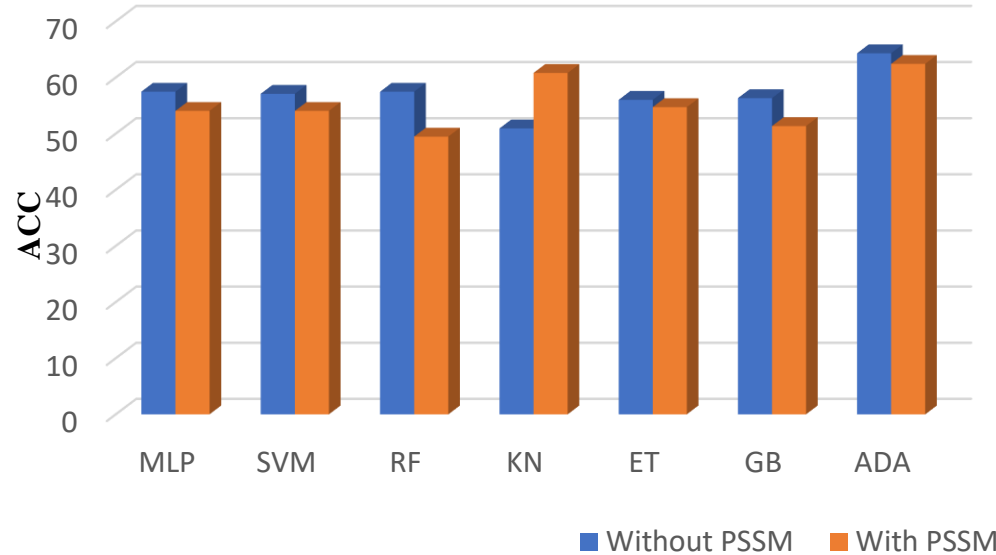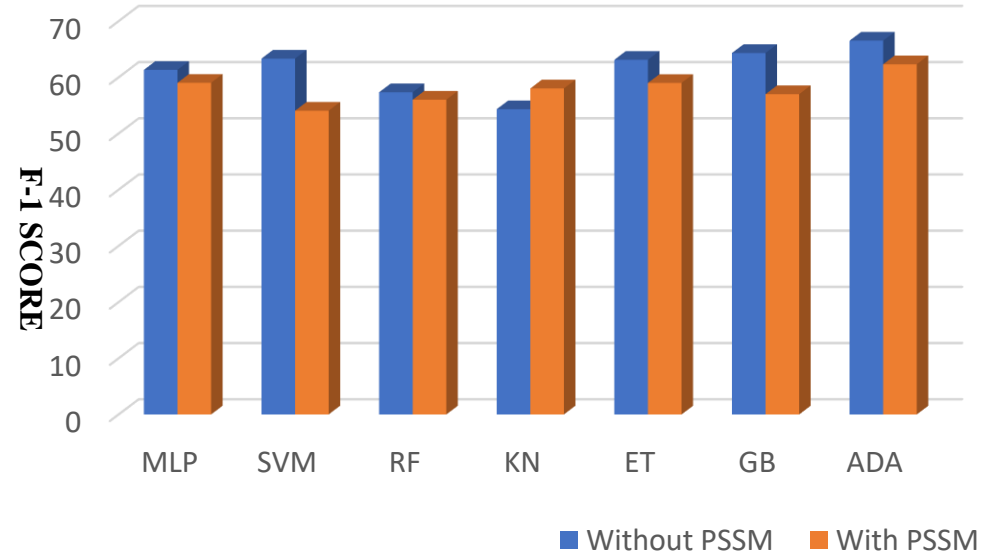

Supplement: s1 [file s1]
